# Supplementary material for: A bHLH transcriptional network regulating the specification of retinal ganglion cells
Source: Oxford University Press journal article supplement (doi:10.1242/dev.01960), 2005-08-04
Supplement: dev01960tables1.pdf [file dev01960tables1.pdf]

**Table S1. Primers used**

| Gene           | External primers                                                                       | Internal primers                                                                           |
|----------------|----------------------------------------------------------------------------------------|--------------------------------------------------------------------------------------------|
| <i>ATH5</i>    | 5' ATH5 5'cttgctgaagcagagagatacag3'<br>3' ATH5 5'ctaattagctatttgaaagtgttcag3'          | 5' ATH5 5'gagaatggattaaccttactgtg3'<br>3' ATH5 5'aatattcgctgtgcataaggatca3'                |
| Neuro M        | 5' Neuro M 5'ctttgcttaacatctcccgtc3'<br>3' Neuro M 5'cgagccctgaacctctccaacc3'          | 5' Neuro M 5'caaagccaaggagatggcagag3'<br>3' Neuro M 5'cctcgatgctgtcgtgctcttc3'             |
| <i>HES1</i>    | 5'HES1 5'cgtgctgggcaaataccg3'<br>3'HES1 5'gtggtaggaggcagttgga3'                        | 5'HES1 5'caatgagtgcacgaacgagg3'<br>3'HES1 5'gttgagccagatgtgcgg3'                           |
| Delta 1        | 5'Delta 1 5'aaaactgtgagctgagtg3'<br>3'Delta 1 5'cactgggctccattagcac3'                  | 5'Delta 1 5'tgtgctgatggaccgtg3'<br>3'Delta 1 5'gctggaactgcagtaatcg3'                       |
| $\beta$ 3nAChR | 5' $\beta$ 3AChR 5'tccattcggtacattccaggc3'<br>3' $\beta$ 3AChR 5'gggcttggtatgtagcgtg3' | 5' $\beta$ 3AChR 5'catcaggcaggtgtccaagac3'<br>3' $\beta$ 3AChR 5'tctacaaagtgctgttcagccac3' |
| <i>ASH1</i>    | 5'ASH1 5'gacgagcacgacgccgtcag3'<br>3'ASH1 5'cgggagagggcgcttatctc3'                     | 5'ASH1 5'gttactcccacgacatgaactc3'<br>3'ASH1 5'tcagaaccagctggtgaagtcg3'                     |
| <i>BRN3C</i>   | 5'BRN3C 5'ctctggccgctgtggatag3'<br>3'BRN3C 5'ttgaggtggtccaggagctc3'                    | 5'BRN3C 5'catccgttcaagccggatgc3'<br>3'BRN3C 5'cctgcgcgggctgatggtg3'                        |
